# Supplementary material for: Discovery of Sexual Dimorphisms in Metabolic and Genetic Biomarkers
Source: PLoS Genet. 2011 Aug 11;7(8):e1002215. doi: 10.1371/journal.pgen.1002215 (PMC3154959; doi:10.1371/journal.pgen.1002215)
Supplement: Table S2 — Phenotypic metabotype differences between males and females of the discovery sample KORA F4. P-values were calculated by a linear regression model with metabolite concentration as outcome and sex as explanatory variable adjusted for different covariables. Gray shaded columns show significant p-values for differences in the metabolite concentrations between males and females after Bonferroni correction (significance level after multiple testing correction = p-value<3.8×10−4). (DOCX) [file pgen.1002215.s007.docx]

.

ß=beta-estimate of linear regression model; r2=explained variance; BMI=Body Mass Index; WHR=Waist-Hip ratio, HDL=high density lipoprotein; LDL=low density lipoprotein; smokers=one or more than one cigarette/day, alcohol consumption for males ≥ 40g alcohol/day, for females ≥ 20g alcohol/day;
